# Supplementary material for: Unprecedented Use of NHC Gold (I) Complexes as Catalysts for the Selective Oxidation of Ethane to Acetic Acid
Source: MDPI journal article supplement (doi:10.3390/ma14154294), 2021-07-31
Supplement: s1 [file s1]

Supplementary

# Unprecedented Use of NHC Gold (I) Complexes as Catalysts for the Selective Oxidation of Ethane to Acetic Acid

Ana P.C. Ribeiro <sup>1,\*</sup>, Inês A.S. Matias <sup>1</sup>, Poorya Zargarán <sup>2</sup>, A. Stephen K. Hashmi <sup>2,3</sup> and Luísa M.D.R.S. Martins <sup>1,\*</sup>

<sup>1</sup> Centro de Química Estrutural and Departamento de Engenharia Química, Instituto Superior Técnico, Universidade de Lisboa, Av. Rovisco Pais, 1049-001 Lisboa, Portugal; ines.matias@tecnico.ulisboa.pt

<sup>2</sup> Organisch-Chemisches Institut, Heidelberg University, Im Neuenheimer Feld 270, 69120 Heidelberg, Germany; poorya.zargarán@gmail.com (P.Z.); hashmi@hashmi.de (A.S.K.H.)

<sup>3</sup> Chemistry Department, Faculty of Science, King Abdulaziz University, Jeddah 21589, Saudi Arabia

\* Correspondence: apribeiro@tecnico.ulisboa.pt (A.P.C.R.); luisammartins@tecnico.ulisboa.pt (L.M.D.R.S.M.); Tel.: +35-12-1841-9389 (L.M.D.R.S.M.)

**Table S1.** Examples of green chemistry metrics applied in this work.

| Parameter             | Formula                                                                                                                          |
|-----------------------|----------------------------------------------------------------------------------------------------------------------------------|
| E- Factor             | $E = \frac{\text{total weight of all waste generated in technological or industrial process}}{\text{per kilogram of a product}}$ |
| Atom Economy (AE)     | $AE(\%) = \frac{\sum \text{Molecular Weight of the products}}{\sum \text{Molecular Weight of the reagents}} \times 100$          |
| Atom Efficiency (AEf) | $AEf = AE(\%) \times \text{Yield}$                                                                                               |

**Citation:** Ribeiro, A.P.C.; Matias, I.A.S.; Zargarán, P.; Hashmi, S.K.; Martins, L.M.D.R.S. Unprecedented Use of NHC Gold(I) Complexes as Catalysts for the Selective Oxidation of Ethane to Acetic Acid. *Materials* **2021**, *14*, 4294. <https://doi.org/10.3390/ma14154294>

Academic Editors: Josep Puig-martí-Luis and Lucia Carlucci

Received: 12 June 2021

Accepted: 28 July 2021

Published: 31 July 2021

**Publisher's Note:** MDPI stays neutral with regard to jurisdictional claims in published maps and institutional affiliations.

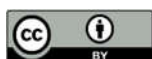

**Copyright:** © 2021 by the authors. Submitted for possible open access publication under the terms and conditions of the Creative Commons Attribution (CC BY) license (<http://creativecommons.org/licenses/by/4.0/>).

|                                                         |                                                                                                                                                |
|---------------------------------------------------------|------------------------------------------------------------------------------------------------------------------------------------------------|
| Mass Intensity (MI)                                     | $MI = \frac{\text{Total mass used in a process (in kilogram)}}{\text{Mass of final product (in kilogram)}}$                                    |
| Mass productivity (MP)                                  | $\text{Mass productivity (\%)} = MI \times 100$                                                                                                |
| Reaction Mass Efficiency (RME)                          | $RME = \frac{1}{1 + E_m}$                                                                                                                      |
|                                                         | <i>where <math>E_m</math> is a value of E-factor based on mass</i>                                                                             |
| Atom Utilization (AU)                                   | $MI = \frac{\text{mass of the final product}}{\text{total mass of all the substances produced}} \times 100$                                    |
| Solvent and catalyst environmental impact parameter (f) | $f = \frac{\sum \text{mass of reaction and postreaction solvents and materials} + \text{mass of final product}}{\text{mass of final product}}$ |

Table S2. Calculated metrics for the oxidation of ethane to acetic acid.

| Entry | Solvent              | Catalyst                                                                   | E-factor theoretical | E-factor | Atom Econ. % | Mass intensity | Mass productivity % | Reaction Mass Efficiency (RME) | Atom utilization % | Solvent and catalyst environmental impact parameter (f) |
|-------|----------------------|----------------------------------------------------------------------------|----------------------|----------|--------------|----------------|---------------------|--------------------------------|--------------------|---------------------------------------------------------|
| 1     | TFA                  | $[\text{ReCl}_2\{\eta^2\text{-N}_2\text{O-C(O)Ph}\}(\text{PPh}_3)_2]$      | 0.4                  | 20.8     | 20.0         | 444.4          | 0.2                 | 4.6                            | 100.0              | 3403.3                                                  |
| 2     |                      | $[\text{ReCl}_2\{\text{N}_2\text{C(O)Ph}\}(\text{Hpz})_2(\text{PPh}_3)_2]$ | 0.5                  | 18.9     | 20.0         | 396.8          | 0.3                 | 5.0                            | 100.0              | 3035.8                                                  |
| 3     |                      | $[\text{ReCl}_2\{\text{N}_2\text{C(O)Ph}\}(\text{Hpz})_2(\text{PPh}_3)]$   | 0.4                  | 1.9      | 44.7         | 58.6           | 1.7                 | 35.0                           | 96.5               | 465.9                                                   |
| 4     |                      | $[\text{ReOCl}_3(\text{PPh}_3)_2]$                                         | 0.4                  | 4.0      | 44.7         | 82.7           | 1.2                 | 20.0                           | 79.1               | 802.1                                                   |
| 5     |                      | $[\text{ReCl}_3\{\text{HC}(\text{pz})_3\}]$                                | 0.2                  | 11.2     | 20.0         | 285.6          | 0.4                 | 8.2                            | 100.0              | 2200.2                                                  |
| 6     |                      | $[\text{ReO}_3\{\text{-SO}_3\text{C}(\text{pz})_3\}]$                      | 0.3                  | 1.2      | 44.7         | 50.0           | 2.0                 | 44.5                           | 95.8               | 402.2                                                   |
| 7     |                      | $[\text{ReClF}\{\text{N}_2\text{C(O)Ph}\}(\text{Hpz})_2(\text{PPh}_3)]$    | 0.2                  | 0.5      | 44.7         | 18.9           | 5.3                 | 66.9                           | 86.0               | 165.2                                                   |
| 8     |                      | $\text{Na}_2[\text{MoO}_4]$                                                | 0.1                  | 1.2      | 20.0         | 58.0           | 1.7                 | 45.5                           | 100.0              | 448.6                                                   |
| 9     |                      | $\text{Nb}_2\text{O}_5$                                                    | 0.3                  | 2.5      | 20.0         | 158.4          | 0.6                 | 28.7                           | 100.0              | 1243.4                                                  |
| 10    |                      | $\text{H4}[\text{PMo11VO40}] \times 34\text{H}_2\text{O}$                  | 0.9                  | 1.6      | 44.7         | 23.4           | 4.3                 | 39.1                           | 91.3               | 187.0                                                   |
| 11    |                      | $\text{H5}[\text{PMo10V2O40}] \times 32\text{H}_2\text{O}$                 | 0.8                  | 3.5      | 44.7         | 38.4           | 2.6                 | 22.1                           | 83.7               | 336.0                                                   |
| 12    |                      | $\text{H6}[\text{PMo9V3O40}] \times 34\text{H}_2\text{O}$                  | 0.8                  | 1.6      | 44.7         | 23.9           | 4.2                 | 38.6                           | 90.8               | 192.8                                                   |
| 13    |                      | $\text{C24H19Cl2NO3Pre}$                                                   | 0.1                  | 10.0     | 44.7         | 71.7           | 1.4                 | 9.1                            | 75.7               | 680.5                                                   |
| 14    | TFA                  | $\text{C}_{21}\text{H}_{32}\text{N}_2\text{AuCl (1)}$                      | 0.2                  | 2.7      | 20.0         | 90.3           | 1.1                 | 26.9                           | 100.0              | 696.8                                                   |
| 15    | ACN/H <sub>2</sub> O |                                                                            | 0.2                  | 0.5      | 20.0         | 36.5           | 2.7                 | 66.5                           | 100.0              | 107.1                                                   |
| 16    | TFA                  | $\text{C}_{21}\text{H}_{30}\text{N}_2\text{AuCl (2)}$                      | 0.2                  | 1.9      | 20.0         | 71.6           | 1.4                 | 34.0                           | 100.0              | 552.6                                                   |
| 17    | ACN/H <sub>2</sub> O |                                                                            | 0.2                  | 0.7      | 20.0         | 41.0           | 2.4                 | 59.4                           | 100.0              | 120.1                                                   |
| 18    | TFA                  | $\text{C}_{21}\text{H}_{30}\text{N}_2\text{O AuCl (3)}$                    | 0.2                  | 4.0      | 20.0         | 120.2          | 0.8                 | 20.1                           | 100.0              | 927.2                                                   |
| 19    | ACN/H <sub>2</sub> O |                                                                            | 0.2                  | 0.8      | 20.0         | 42.4           | 2.4                 | 57.1                           | 100.0              | 124.3                                                   |
| 20    | TFA                  | $\text{C}_{27}\text{H}_{44}\text{N}_2\text{AuCl (4)}$                      | 0.2                  | 2.9      | 20.0         | 91.6           | 1.1                 | 25.9                           | 100.0              | 705.7                                                   |
| 21    | ACN/H <sub>2</sub> O |                                                                            | 0.2                  | 0.8      | 20.0         | 42.9           | 2.3                 | 55.3                           | 100.0              | 125.8                                                   |

Table S3. Calculated frequency metrics for the oxidation of ethane to acetic acid.

| Entry | Solvent              | Catalyst                                                                         | Time /h | e-factor frequency | Atom Economy over time /% | Mass intensity | Mass productivity /% | Reaction Mass Efficiency Frequency (RMEF) /% | Atom utilization over time /% | Solvent and catalyst environmental impact frequency parameter (ft) |
|-------|----------------------|----------------------------------------------------------------------------------|---------|--------------------|---------------------------|----------------|----------------------|----------------------------------------------|-------------------------------|--------------------------------------------------------------------|
| 1     | TFA                  | $[\text{ReCl}_2\{\eta^2\text{-N}_2\text{O-C(O)Ph}\}(\text{PPh}_3)_2]$            | 20      | 1                  | 1                         | 444            | 0                    | 0                                            | 5                             | 170                                                                |
| 2     |                      | $[\text{ReCl}_2\{\text{N}_2\text{C(O)Ph}\}(\text{Hpz})_2(\text{PPh}_3)_2]$       | 20      | 1                  | 1                         | 397            | 0                    | 0                                            | 5                             | 152                                                                |
| 3     |                      | $[\text{ReCl}_2\{\text{N}_2\text{C(O)Ph}\}(\text{Hpz})_2(\text{PPh}_3)]$         | 20      | 0                  | 2                         | 59             | 2                    | 2                                            | 5                             | 23                                                                 |
| 4     |                      | $[\text{ReOCl}_3(\text{PPh}_3)_2]$                                               | 20      | 0                  | 2                         | 83             | 1                    | 1                                            | 4                             | 40                                                                 |
| 5     |                      | $[\text{ReCl}_3\{\text{HC(pz)}_3\}]$                                             | 20      | 1                  | 1                         | 286            | 0                    | 0                                            | 5                             | 110                                                                |
| 6     |                      | $[\text{ReO}_3\{\text{-SO}_3\text{C(pz)}_3\}]$                                   | 20      | 0                  | 2                         | 50             | 2                    | 2                                            | 5                             | 20                                                                 |
| 7     |                      | $[\text{ReClF}\{\text{N}_2\text{C(O)Ph}\}(\text{Hpz})_2(\text{PPh}_3)]$          | 20      | 0                  | 2                         | 19             | 5                    | 3                                            | 4                             | 8                                                                  |
| 8     |                      | $\text{Na}_2[\text{MoO}_4]$                                                      | 20      | 0                  | 1                         | 58             | 2                    | 2                                            | 5                             | 22                                                                 |
| 9     |                      | $\text{Nb}_2\text{O}_5$                                                          | 20      | 0                  | 1                         | 158            | 1                    | 1                                            | 5                             | 62                                                                 |
| 10    |                      | $\text{H}_4[\text{PMo}_{11}\text{VO}_{40}] \times 34\text{H}_2\text{O}$          | 20      | 0                  | 2                         | 23             | 4                    | 2                                            | 5                             | 9                                                                  |
| 11    |                      | $\text{H}_5[\text{PMo}_{10}\text{V}_2\text{O}_{40}] \times 32\text{H}_2\text{O}$ | 20      | 0                  | 2                         | 38             | 3                    | 1                                            | 4                             | 17                                                                 |
| 12    |                      | $\text{H}_6[\text{PMo}_9\text{V}_3\text{O}_{40}] \times 34\text{H}_2\text{O}$    | 20      | 0                  | 2                         | 24             | 4                    | 2                                            | 5                             | 10                                                                 |
| 13    |                      | $\text{C}_{24}\text{H}_{19}\text{Cl}_2\text{NO}_3\text{Pre}$                     | 20      | 0                  | 2                         | 72             | 1                    | 0                                            | 4                             | 34                                                                 |
| 14    | TFA                  | $\text{C}_{21}\text{H}_{32}\text{N}_2\text{AuCl (1)}$                            | 20      | 0                  | 1                         | 90             | 1                    | 1                                            | 5                             | 35                                                                 |
| 15    | ACN/H <sub>2</sub> O |                                                                                  | 20      | 0                  | 1                         | 37             | 3                    | 3                                            | 5                             | 5                                                                  |
| 16    | TFA                  | $\text{C}_{21}\text{H}_{30}\text{N}_2\text{AuCl (2)}$                            | 20      | 0                  | 1                         | 72             | 1                    | 2                                            | 5                             | 28                                                                 |
| 17    | ACN/H <sub>2</sub> O |                                                                                  | 20      | 0                  | 1                         | 41             | 2                    | 3                                            | 5                             | 6                                                                  |
| 18    | TFA                  | $\text{C}_{21}\text{H}_{30}\text{N}_2\text{OAUCl (3)}$                           | 20      | 0                  | 1                         | 120            | 1                    | 1                                            | 5                             | 46                                                                 |
| 19    | ACN/H <sub>2</sub> O |                                                                                  | 20      | 0                  | 1                         | 42             | 2                    | 3                                            | 5                             | 6                                                                  |
| 20    | TFA                  | $\text{C}_{27}\text{H}_{44}\text{N}_2\text{AuCl (4)}$                            | 20      | 0                  | 1                         | 92             | 1                    | 1                                            | 5                             | 35                                                                 |
| 21    | ACN/H <sub>2</sub> O |                                                                                  | 20      | 0                  | 1                         | 43             | 2                    | 3                                            | 5                             | 6                                                                  |
